# Supplementary material for: Synthesis of poly(dimethylsiloxane)-block-poly[3-(triisopropyloxysilyl) propyl methacrylate] and its use in the facile coating of hydrophilically patterned superhydrophobic fabrics
Source: Royal Society of Chemistry journal article supplement (doi:10.1039/c5ra02067k), 2015-01-01
Supplement: c5ra02067k1.pdf [file c5ra02067k1.pdf]

## SUPPORTING INFORMATION

### **Synthesis of Poly(dimethylsiloxane)-*block*-Poly[3-(triisopropoxy)silyl]propyl methacrylate] and its use in the Facile Coating of Hydrophilically Patterned Superhydrophobic Fabrics**

Muhammad Rabnawaz, Zijie Wang, Yu Wang, Ian Wyman, Heng Hu, Guojun Liu\*

Department of Chemistry, Queen's University, 90 Bader Lane, Kingston, Ontario, Canada K7L 3N6 Guojun Liu (E-mail: [Guojun.Liu@chem.queensu.ca](mailto:Guojun.Liu@chem.queensu.ca))

#### **Contact Angle Measurements.**

Static, advancing, and receding contact angles were measured at room temperature ( $21 \pm 1$  °C) using deionized water. The measurement were performed using a Dataphysics OCA 15 Pro optical contact angle measuring system. All static contact angles were measured using 5.0  $\mu$ L droplets of water. The contact angles reported for each sample represented the average of at least three measurements together with the calculated standard deviations.

#### **Synthesis of IPSMA**

The IPSMA monomer was synthesized according to a literature method<sup>1</sup> and the <sup>1</sup>H NMR spectrum of IPSMA is shown in Figure S1. Isopropanol (40 mL) was added into a 250 mL flask along with *p*-toluenesulfonic acid (0.10 g). 3-(trimethoxysilyl)propyl methacrylate (10.0 g) was added and this reaction mixture was stirred at 100 °C for 5 h. At ~30 min intervals, isopropanol (20 mL) were added to the reaction mixture and continually distilled to remove the methanol by-product along with excess isopropanol. After 5 h, the flask was cooled down to room temperature and was poured into a saturated aqueous NaHCO<sub>3</sub> solution (100 mL). This was followed by extraction with hexane (3  $\times$  50 mL). The combined hexane layer was washed with a

saturated aqueous NaCl solution and dried over MgSO<sub>4</sub> for 5 h. The hexane was removed via rotary evaporation and the product was distilled under vacuum using an oil bath that was heated to a temperature of 120-130 °C. IPSMA was obtained as clear liquid in a 68% yield. <sup>1</sup>H NMR (400 MHz, CDCl<sub>3</sub>, δ): 0.58 (dd, *J* = 11.3, 5.4 Hz, 1.10 (d, *J* = 6.2 Hz, 18 H, 1.70 (m, 2H, CH<sub>2</sub>), 1.80 (m, 2H, CO<sub>2</sub>CH<sub>2</sub>CH<sub>2</sub>CH<sub>2</sub>), -COOCH<sub>2</sub>), 1.91 (s, -3H, CH<sub>3</sub>), 4.10 (t, *J* = 6.7 Hz, 2H, -[OCH(CH<sub>3</sub>)<sub>2</sub>]<sub>3</sub>), 4.20 (m, OCH(CH<sub>3</sub>)<sub>2</sub>)<sub>3</sub>, 3H], 2H, CH<sub>2</sub>-Si), 5.60 (s, 1 H, CH<sub>2</sub>=CCR(CH<sub>3</sub>)), 6.10 (s, 1 H, CH<sub>2</sub>=CCR(CH<sub>3</sub>)) ppm.

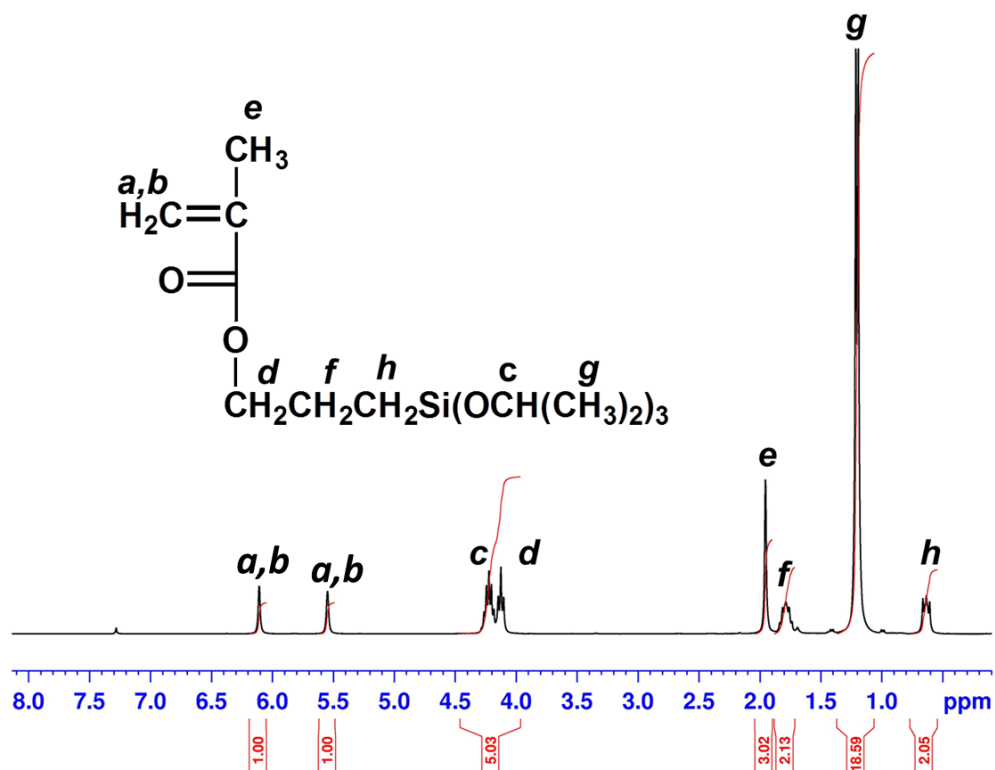

**Figure S1.** <sup>1</sup>H NMR spectrum (recorded in CDCl<sub>3</sub> at 400 MHz) of IPSMA.

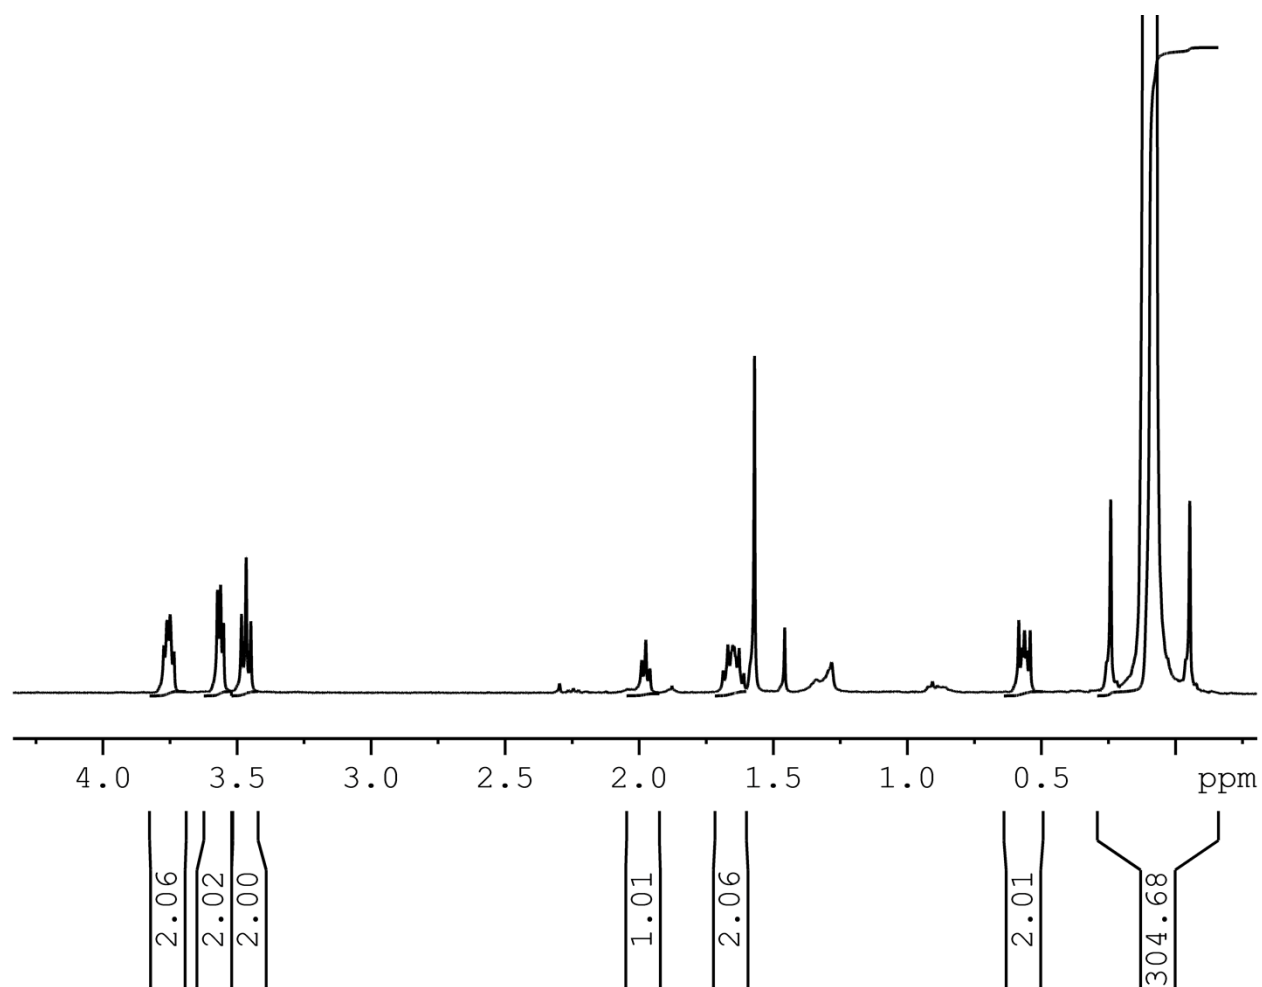

**Figure S2.**  $^1\text{H}$  NMR spectrum (recorded in  $\text{CDCl}_3$  at 400 MHz) of fractionated  $\text{PDMS}_{50}\text{-OH}$ . The integrations of different signals were measured for quantitative analysis.

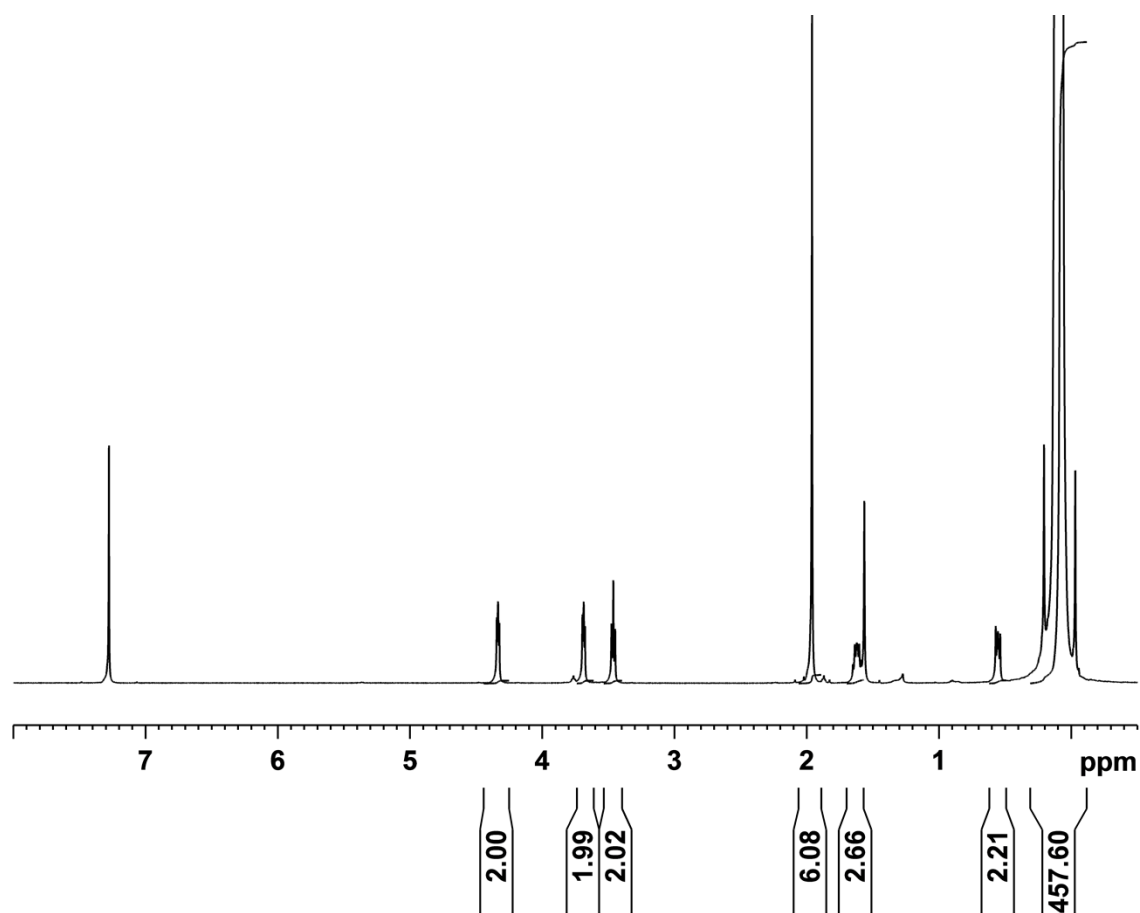

**Figure S3.**  $^1\text{H}$  NMR spectrum (recorded in  $\text{CDCl}_3$  at 400 MHz) of PDMS-Br. The integrations of different signals were measured for quantitative analysis.

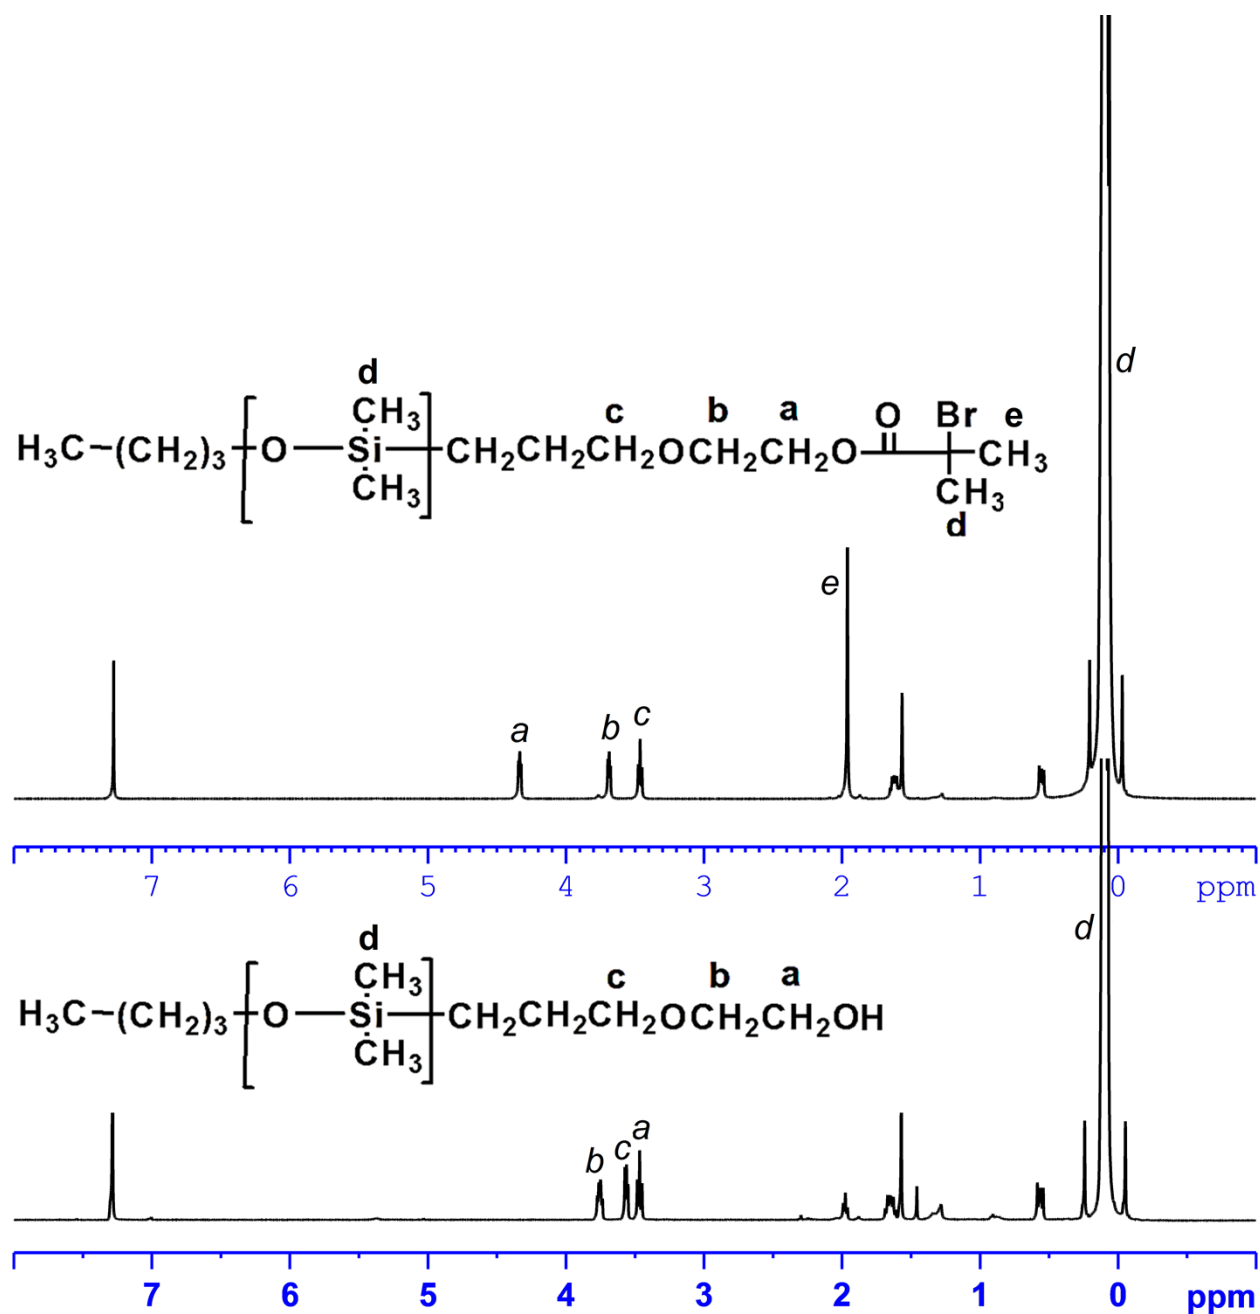

**Figure S4.**  $^1\text{H}$  NMR spectrum (recorded in  $\text{CDCl}_3$ ) of PDMS-OH (bottom), and PDMS-Br (Top).

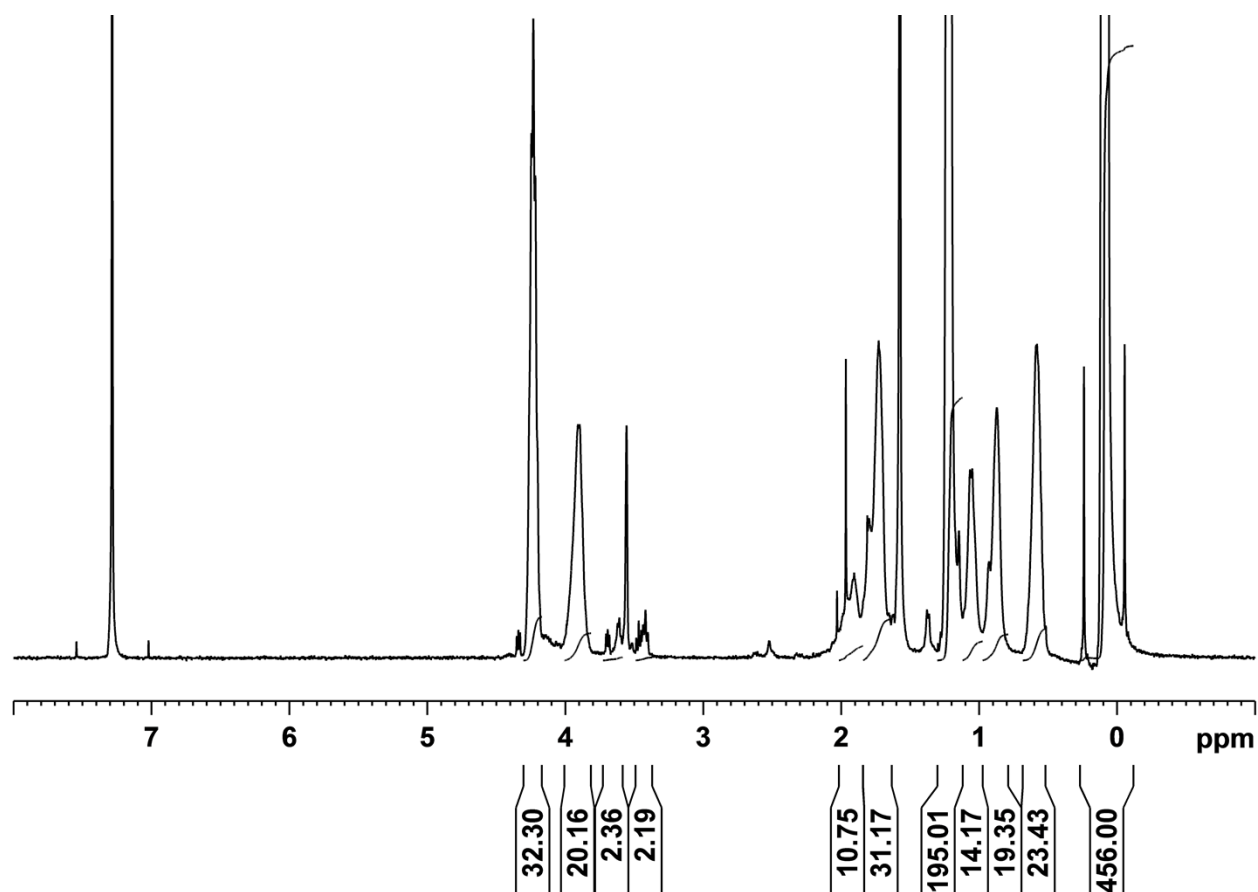

**Figure S5.**  $^1\text{H}$  NMR spectrum (recorded in  $\text{CDCl}_3$  at 400 MHz) of PDMS-*b*-PIPSMA. The integrations of each signal was measured for quantitative analysis.

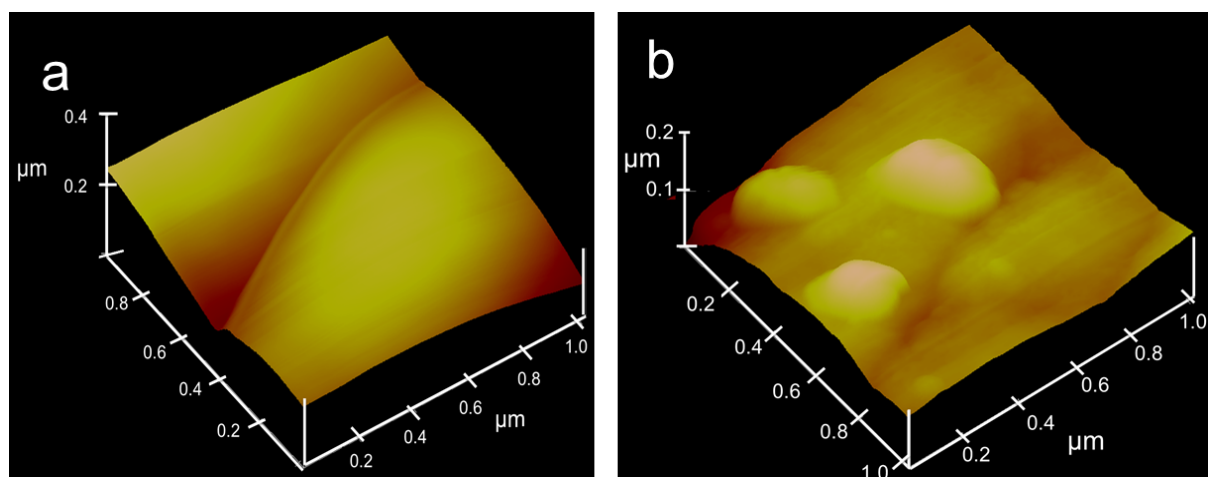

Figure S6. AFM images (a) uncoated cotton, (b) Coated cotton after extraction with THF at 60 °C for 1 h.

## References.

- (1) Macoretta, D.; Rabnawaz, M.; Grozea, C. M.; Liu, G.; Wang, Y.; Crumblehulme, A.; Wyer, M. *ACS Appl. Mater. Interfaces* **2014**, *6*, 21435.
